# Supplementary material for: Quantitative analysis of multiple breast cancer biomarkers using DNA-PAINT
Source: Royal Society of Chemistry journal article supplement (doi:10.1039/d2ay00670g), 2022-01-01
Supplement: d2ay00670g1.pdf [file d2ay00670g1.pdf]

*Supporting Information*

## Quantitative analysis of multiple breast cancer biomarkers using DNA-PAINT

Zengwei Chen, Gaoqiang Yin, Jinxiu Wei, Tongsheng Qi, Ziting Qian, Zhuyuan Wang, Shenfei Zong\*,  
Yiping Cui\*

*Advanced Photonics Center, Southeast University, Nanjing 210096, Jiangsu, China*

[\\*sfzong@seu.edu.cn](mailto:sfzong@seu.edu.cn); [cyp@seu.edu.cn](mailto:cyp@seu.edu.cn)

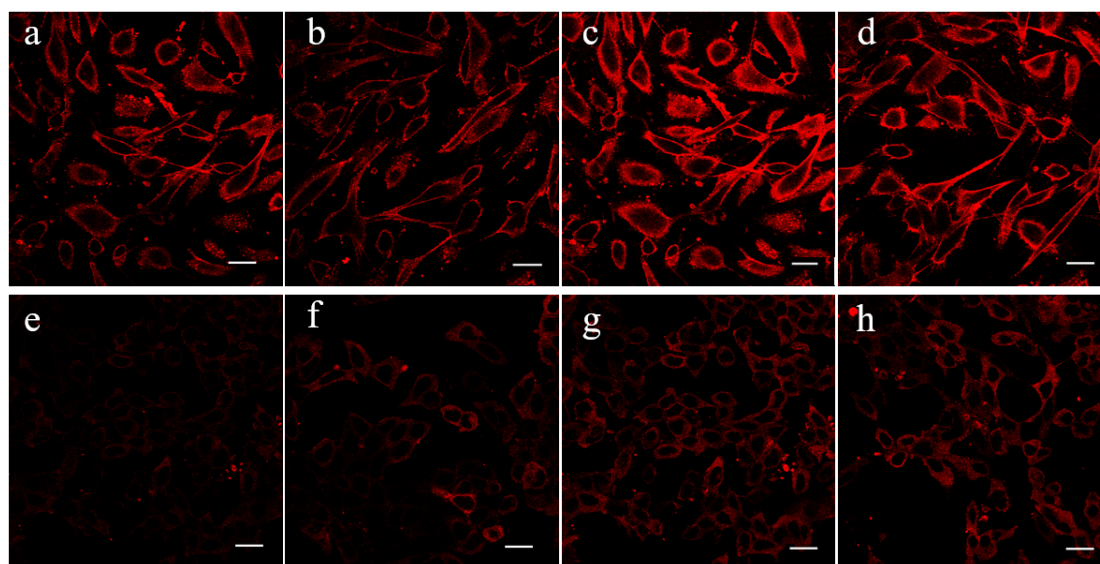

Fig. S1. CLSM images of PD-L1 in MDA-MB-231 cell (a-d) and MCF-7 cell (e-h). Scale bar: 20  $\mu\text{m}$ . The scanning speed of a, b, e and f was 4.0  $\mu\text{s}/\text{pixel}$ , and that of c, d, g and h was 8.0  $\mu\text{s}/\text{pixel}$ . The other imaging parameters (e.g. laser power, pinhole size, etc) were the same.

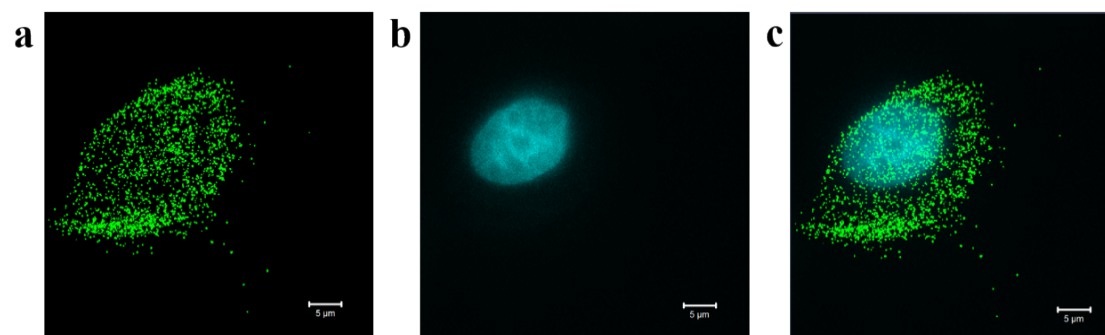

Fig. S2. DNA-PAINT imaging of PD-L1 protein on MCF-7 cell. (a) DNA-PAINT image of PD-L1 protein on the surface of MCF-7 cell. (b) Nuclei staining fluorescence image of MCF-7 cell. (c) The merged image of the first two channels of MCF-7 cell. Scale bar: 5  $\mu\text{m}$ .

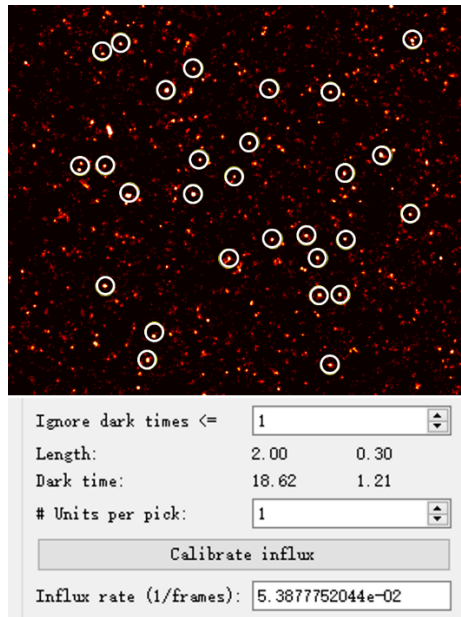

Fig. S3. The influx rate was obtained by calculating the average dark time of multiple binding sites using Picasso software.

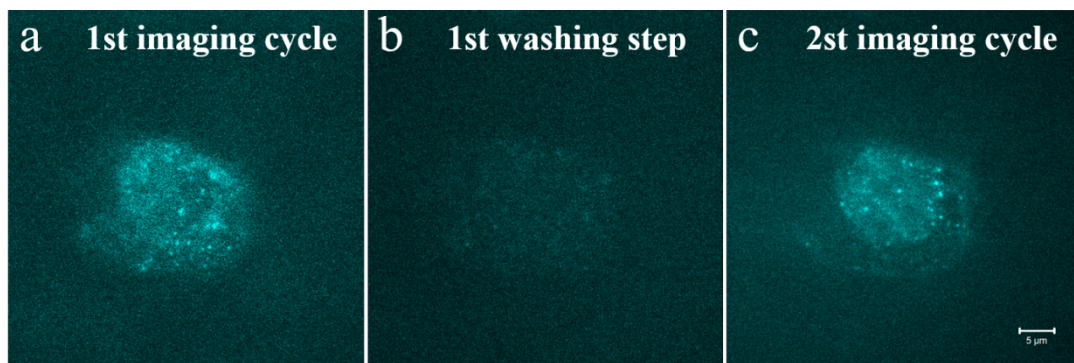

Fig. S4. The wide-field images of PD-L1 and CTLA-4 proteins before and after washing. No obvious fluorescence was detected after washing step, indicating independent imaging between cycles. Scale bar: 5  $\mu$ m.

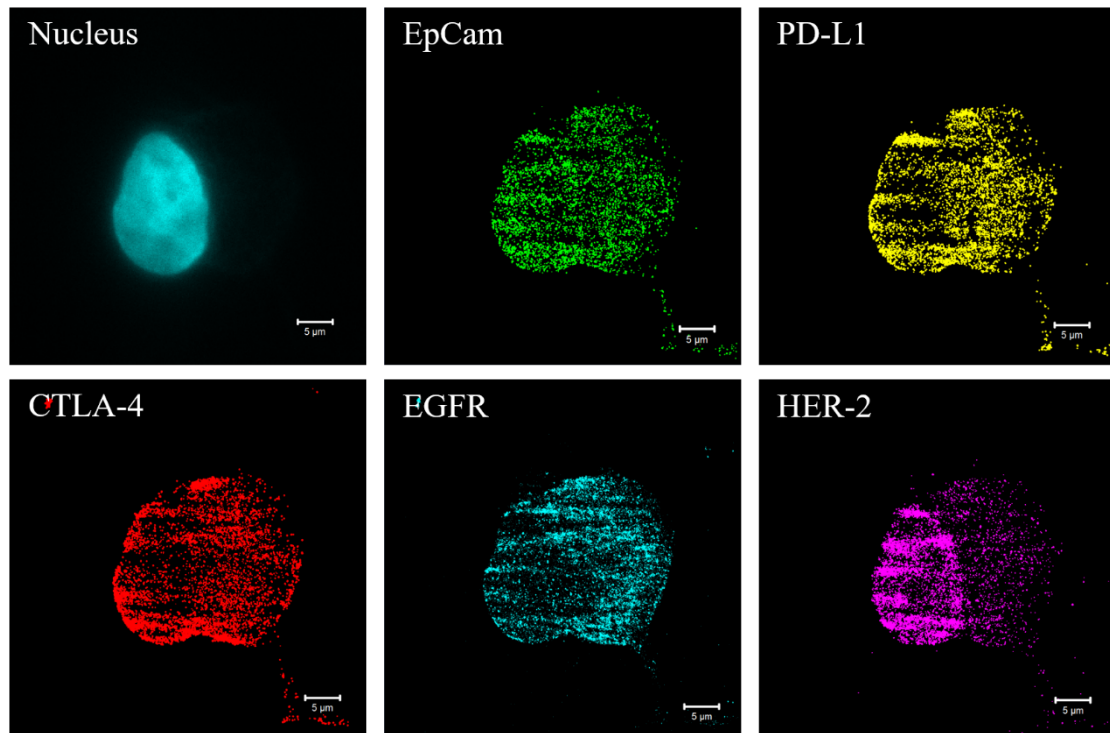

Fig. S5. Exchange-PAINT imaging of MCF-7 cell. The figure shows DNA-PAINT images of the five proteins on the same MCF-7 cell surface. The position of nucleus overlapped well with the proteins, indicating the labeling was successful. Scale bar: 5 µm.

**Supplementary Table S1. The sequences of docking and imager strands for individual biomarker.**

| Identification             | Sequences            | Identification            | Sequences         |
|----------------------------|----------------------|---------------------------|-------------------|
| Docking strands for EpCam  | Azide-TTAATTAGGAT-3' | Imager strands for EpCam  | 5'-CATCCTAATT-Cy5 |
| Docking strands for HER-2  | Azide-TTATGAATCTA-3' | Imager strands for HER-2  | 5'-GTAGATTCAT-Cy5 |
| Docking strands for PD-L1  | Azide-TTATCTACATA-3' | Imager strands for PD-L1  | 5'-TATGTAGATC-Cy5 |
| Docking strands for EGFR   | Azide-TTAATTGAGTA-3' | Imager strands for EGFR   | 5'-GTACTCAATT-Cy5 |
| Docking strands for CTLA-4 | Azide-TTCTTCATTA-3'  | Imager strands for CTLA-4 | 5'-GTAATGAAGA-Cy5 |
